# Supplementary material for: Incidence and Outcomes of Valve-in-Valve Transcatheter Aortic Valve Implantation in Failed Bioprosthetic Valves
Source: MDPI journal article supplement (doi:10.3390/jcm12185868), 2023-09-09
Supplement: s1 [file s1]

**Supplementary Table S1.** Patient Baseline Characteristics compared between patients undergoing valve-in-valve- (ViV) procedures and the control group.

| Variable                           | N     | Overall, N = 1,370 <sup>1</sup> | ViV, N = 58 <sup>1</sup> | Control, N = 1,312 <sup>1</sup> | p-value <sup>2</sup> |
|------------------------------------|-------|---------------------------------|--------------------------|---------------------------------|----------------------|
| <b>Basic characteristics</b>       |       |                                 |                          |                                 |                      |
| Sex                                | 1,365 |                                 |                          |                                 | 0.4                  |
| Male                               |       | 684 (50%)                       | 32 (55%)                 | 652 (50%)                       |                      |
| Female                             |       | 681 (50%)                       | 26 (45%)                 | 655 (50%)                       |                      |
| Age                                | 1,364 | 82.7 (78.9, 86.2)               | 80.0 (76.0, 84.0)        | 82.7 (79.0, 86.3)               | 0.004                |
| BMI                                | 1,361 | 26.2 (23.5, 29.4)               | 25.0 (23.0, 29.0)        | 26.2 (23.5, 29.4)               | 0.4                  |
| LVEF                               | 1,265 | 58 (45, 62)                     | 54 (44, 60)              | 59 (45, 62)                     | 0.094                |
| Euro SCORE II                      | 1,178 | 2.13 (1.26, 4.14)               | 6.24 (3.00, 11.00)       | 2.03 (1.20, 3.90)               | <0.001               |
| <b>Preconditions</b>               |       |                                 |                          |                                 |                      |
| Diabetes                           | 1,365 | 395 (29%)                       | 21 (36%)                 | 374 (29%)                       | 0.2                  |
| Dyslipidemia                       | 1,365 | 809 (59%)                       | 35 (60%)                 | 774 (59%)                       | 0.9                  |
| Hypertension                       | 1,365 | 1,110 (81%)                     | 47 (81%)                 | 1,063 (81%)                     | >0.9                 |
| Coronary artery disease            | 1,365 | 786 (58%)                       | 38 (66%)                 | 748 (57%)                       | 0.2                  |
| Myocardial infarction              | 1,365 | 239 (18%)                       | 14 (24%)                 | 225 (17%)                       | 0.2                  |
| eGFR                               | 1,358 | 51 (38, 66)                     | 49 (35, 63)              | 51 (38, 66)                     | 0.3                  |
| Hemoglobin                         | 1,361 | 126 (114, 137)                  | 120 (108, 138)           | 126 (115, 137)                  | 0.11                 |
| <b>Previous interventions</b>      |       |                                 |                          |                                 |                      |
| Any Heart Surgery                  | 1,365 | 152 (11%)                       | 50 (86%)                 | 102 (7.8%)                      | <0.001               |
| Surgical Aortic Valve Replacement  | 1,370 | 56 (4.1%)                       | 46 (79%)                 | 10 (0.8%)                       | <0.001               |
| Coronary Artery Bypass Grafting    | 1,370 | 113 (8.2%)                      | 19 (33%)                 | 94 (7.2%)                       | <0.001               |
| Prior pacemaker                    | 1,365 | 149 (11%)                       | 11 (19%)                 | 138 (11%)                       | 0.045                |
| Percutaneous Coronary Intervention | 1,365 | 487 (36%)                       | 22 (38%)                 | 465 (36%)                       | 0.7                  |

<sup>1</sup> n (%); Median (IQR)

<sup>2</sup> Pearson's Chi-squared test; Wilcoxon rank sum test; Fisher's exact test;

LVEF = Left ventricular ejection fraction, EUROSCORE = European system for cardiac operative risk evaluation; eGFR = estimated glomerular filtration rate

**Supplementary Table S2.** Patient Baseline Characteristics compared between patients undergoing TiSAVR and TiTAVR.

| Variable                           | N  | Overall, N = 58 <sup>1</sup> | TiTAVR, N = 13 <sup>1</sup> | TiSAVR, N = 45 <sup>1</sup> | p-value <sup>2</sup> |
|------------------------------------|----|------------------------------|-----------------------------|-----------------------------|----------------------|
| <b>Basic characteristics</b>       |    |                              |                             |                             |                      |
| Sex                                | 58 |                              |                             |                             | >0.9                 |
| Male                               |    | 32 (55%)                     | 7 (54%)                     | 25 (56%)                    |                      |
| Female                             |    | 26 (45%)                     | 6 (46%)                     | 20 (44%)                    |                      |
| Age                                | 57 | 80 (76, 84)                  | 85 (79, 87)                 | 79 (74, 83)                 | 0.015                |
| BMI                                | 57 | 25.0 (23.0, 29.0)            | 25.0 (22.0, 28.0)           | 26.0 (24.0, 29.0)           | 0.5                  |
| LVEF                               | 56 | 54 (44, 60)                  | 50 (45, 60)                 | 55 (43, 60)                 | 0.5                  |
| Euro SCORE II                      | 58 | 6 (3, 11)                    | 8 (4, 13)                   | 6 (3, 9)                    | 0.4                  |
| <b>Preconditions</b>               |    |                              |                             |                             |                      |
| Diabetes                           | 58 | 21 (36%)                     | 5 (38%)                     | 16 (36%)                    | >0.9                 |
| Dyslipidemia                       | 58 | 35 (60%)                     | 9 (69%)                     | 26 (58%)                    | 0.5                  |
| Hypertension                       | 58 | 47 (81%)                     | 12 (92%)                    | 35 (78%)                    | 0.4                  |
| Coronary artery disease            | 58 | 38 (66%)                     | 11 (85%)                    | 27 (60%)                    | 0.2                  |
| Myocardial infarction              | 58 | 14 (24%)                     | 4 (31%)                     | 10 (22%)                    | 0.7                  |
| eGFR                               | 58 | 49 (35, 63)                  | 39 (31, 44)                 | 52 (38, 69)                 | 0.028                |
| Hemoglobin                         | 58 | 120 (108, 138)               | 108 (87, 117)               | 124 (113, 140)              | 0.008                |
| <b>Previous interventions</b>      |    |                              |                             |                             |                      |
| Any Heart Surgery                  | 58 | 50 (86%)                     | 5 (38%)                     | 45 (100%)                   | <0.001               |
| Surgical Aortic Valve Replacement  | 58 | 46 (79%)                     | 1 (7%)                      | 45 (100%)                   | <0.001               |
| Coronary Artery Bypass Grafting    | 58 | 19 (33%)                     | 2 (15%)                     | 17 (38%)                    | 0.2                  |
| Prior pacemaker                    | 58 | 11 (19%)                     | 3 (23%)                     | 8 (18%)                     | 0.7                  |
| Percutaneous Coronary Intervention | 58 | 22 (38%)                     | 7 (54%)                     | 15 (33%)                    | 0.2                  |

<sup>1</sup> n (%); Median (IQR)

<sup>2</sup> Pearson's Chi-squared test; Wilcoxon rank sum test; Fisher's exact test;

TiSAVR = Transcatheter aortic valve replacement (TAVR) in surgical aortic valve replacement; TiTAVR = TAVR in TAVR; LVEF = Left ventricular ejection fraction, EUROSCORE = European system for cardiac operative risk evaluation; eGFR = estimated glomerular filtration rate;
